# Supplementary material for: CD47 Expression Defines Efficacy of Rituximab with CHOP in Non–Germinal Center B-cell (Non-GCB) Diffuse Large B-cell Lymphoma Patients (DLBCL), but Not in GCB DLBCL
Source: Oxford University Press journal article supplement (doi:10.1158/2326-6066.cir-18-0781), 2019-08-13
Supplement: 23266066cir180781-sup-211424_2_supp_5492178_pqtd8q.docx [file 23266066cir180781-sup-211424_2_supp_5492178_pqtd8q.docx]

**Supplemental Table 1**. GEO accession numbers. Indicated are the presence of clinical meta-data: cell-of-origen (COO), age, gender, treatment data available, response, references (pubmed identification numbers (PMID).

| **Series_identifier** | **number patients** | **Platform** | **COO** | **age** | **gender** | **treatment** | **respons** | **References (PMID)** | |
| --- | --- | --- | --- | --- | --- | --- | --- | --- | --- |
| GSE10172 | 36 | GPL96 | yes | yes | yes | no | no | 18509088 | |
| GSE10524 | 15 | GPL570 | no | no | yes | no | no | Citation missing |
| GSE10846 | 420 | GPL570 | yes | yes | yes | yes | yes | 19038878 | |
| GSE11318 | 10 | GPL570 | yes | no | yes | no | yes | 18765795 | |
| GSE12195 | 73 | GPL570 | yes/no | no | no | no | no | 22137796 | |
| GSE12453 | 10 | GPL570 | no | no | no | no | no | 18794340 | |
| GSE12630 | 2 | GPL96 | no | no | yes | no | no | 19332734 | |
| GSE19246 | 59 | GPL570 | yes | no | no | no | no | 20688907 | |
| GSE22470 | 270 | GPL96 | yes | yes | yes | no | no | 21487109 | |
| GSE23501 | 26 | GPL570 | yes | yes | yes | yes | yes | 20610814 | |
| GSE25639 | 26 | GPL570 | no | no | no | no | no | 22689981 | |
| GSE31312 | 364 | GPL570 | yes | no | no | yes | no | 26324762 | |
| GSE34171 | 164 | GPL570 + GPL96 | yes | no | no | no | no | 22975378 | |
| GSE38885 | 21 | GPL570 | no | no | no | no | no | 23489474 | |
| GSE44164 | 32 | GPL96 | yes | yes | yes | no | no | 24179151 | |
| GSE44337 | 9 | GPL570 | no | no | no | no | no | Citation missing |
| GSE4475 | 220 | GPL96 | yes | yes | yes | yes | yes | 16760442 | |
| GSE48097 / GSE48184 | 29 | GPL570 | yes | no | no | no | no | 24030260 | |
| GSE57611 / GSE57612 | 11 | GPL96 | yes | no | no | no | no | 25042405 | |
| GSE9429 | 7 | GPL96 | no | no | no | no | no | 19373655 | |
