# Supplementary material for: CD47 Expression Defines Efficacy of Rituximab with CHOP in Non–Germinal Center B-cell (Non-GCB) Diffuse Large B-cell Lymphoma Patients (DLBCL), but Not in GCB DLBCL
Source: Oxford University Press journal article supplement (doi:10.1158/2326-6066.cir-18-0781), 2019-08-13
Supplement: 23266066cir180781-sup-211424_2_supp_5492181_pqtd8m.docx [file 23266066cir180781-sup-211424_2_supp_5492181_pqtd8m.docx]

**Supplemental Table 4. Uni- and multivariate analysis of R-CHOP treated DLBCL patients.** The impact of expression of *CD47* was analyzed by comparing 5-year overall survival patients with high *CD47* expression and low *CD47* expression. Abbreviations: IPI; international prognostic index, COO; Cell-of-origin, P<0,05 is considered statistically significant.

|  | **Univariate analysis** | | | **Multivariate analysis** | | |
| --- | --- | --- | --- | --- | --- | --- |
| **Low CD47**  **(n=233)** | **High CD47**  **(n=447)** | **P-value** | **Hazard ratio** | **P-value** | **95% CI** |
| **Age categorized**  <60 yr  ≥ 60 yr | 95  114 | 165  239 | 0.273 | 1.142 | 0.510 | [0.770-1.694] |
| **COO**  GCB, n(%)  Non-GCB, n(%) | 155  78 | 150  297 | 0.000 | 1.916 | 0.002 | [1.267-2.897] |
| **IPI categorized**  Low risk (0,1)  Intermediate risk (2,3)  High risk (4,5) | 89  73  25 | 146  186  46 | 0.068 | 2.056  5.548 | 0.002  0.000 | [1.311-3.224]  [3.286-9.367] |
