# Supplementary material for: CD47 Expression Defines Efficacy of Rituximab with CHOP in Non–Germinal Center B-cell (Non-GCB) Diffuse Large B-cell Lymphoma Patients (DLBCL), but Not in GCB DLBCL
Source: Oxford University Press journal article supplement (doi:10.1158/2326-6066.cir-18-0781), 2019-08-13
Supplement: 23266066cir180781-sup-211424_2_supp_5492182_pqtd8p.docx [file 23266066cir180781-sup-211424_2_supp_5492182_pqtd8p.docx]

Supplemental Table 5. Univariate analysis in R-CHOP treated non-GCB patients

|  | **Univariate analysis** | | |
| --- | --- | --- | --- |
| **Low CD47**  **(n=78)** | **High CD47 (n=297)** | **P-value** |
| **Age categorized**  **<60 yr**  **≥ 60 yr** | 21  46 | 93  171 | 0.550 |
| **IPI categorized**  Low risk (0,1)  Intermediate risk (2,3)  High risk (4,5) | 26  29  8 | 87  130  36 | 0.594 |
